# Supplementary material
Source: Springer Nature journal article supplement (https://www.springermedizin.de/resource/supplementary/12885_2012_3413_MOESM2_ESM.pdf/9463470)
Supplement: MOESM2 [file 9463470]

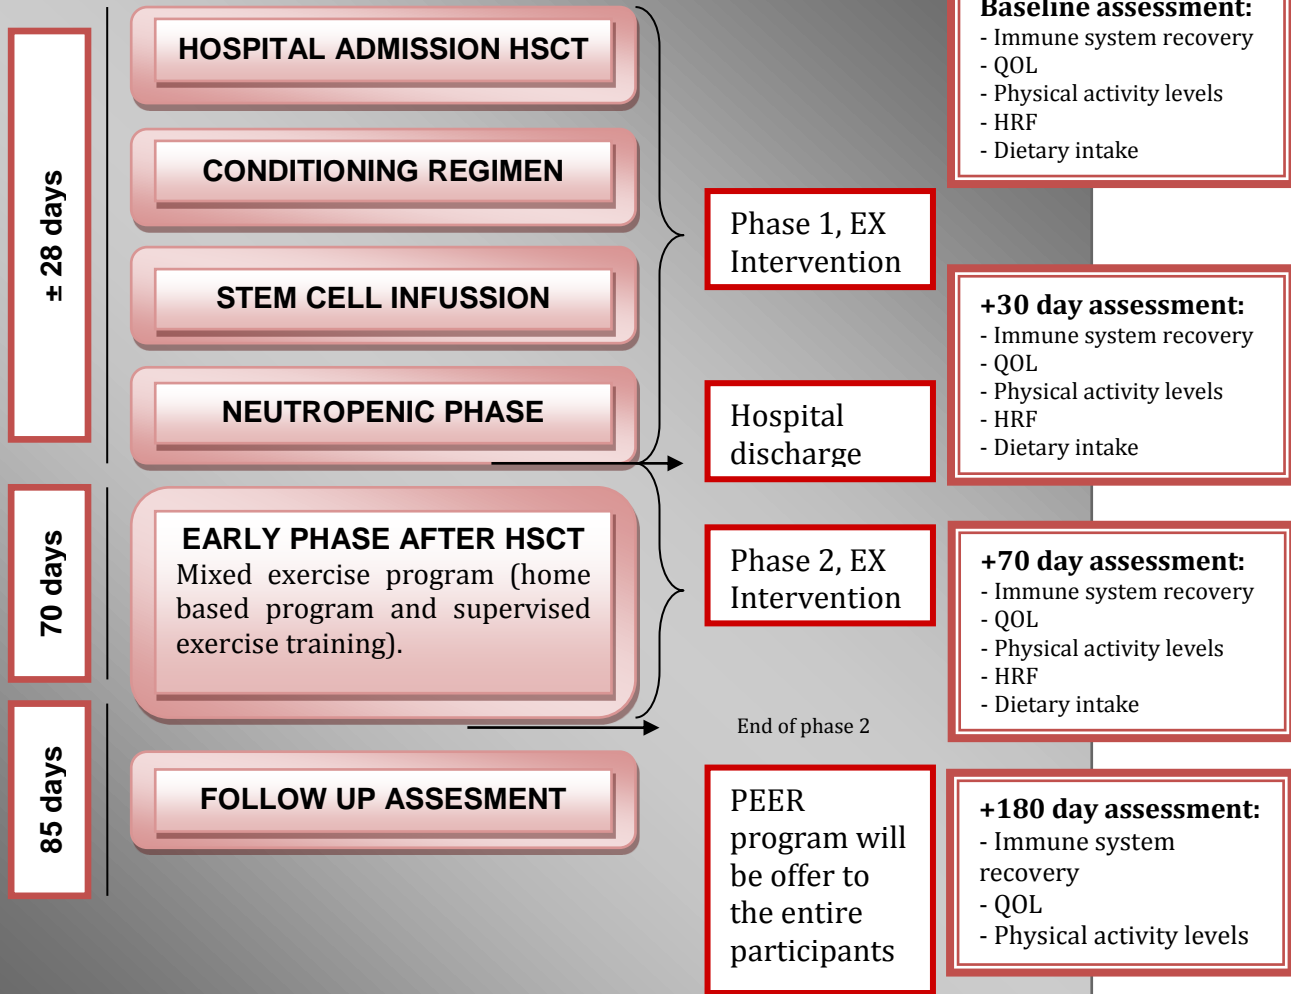

**HOSPITAL ADMISSION HSCT**

**CONDITIONING REGIMEN**

**STEM CELL INFUSION**

**NEUTROPENIC PHASE**

**EARLY PHASE AFTER HSCT**  
Mixed exercise program (home based program and supervised exercise training).

**FOLLOW UP ASSESMENT**

**Phase 1, EX Intervention**

**Hospital discharge**

**Phase 2, EX Intervention**

**End of phase 2**

**PEER program will be offer to the entire participants**

**Baseline assessment:**

- Immune system recovery
- QOL
- Physical activity levels
- HRF
- Dietary intake

**+30 day assessment:**

- Immune system recovery
- QOL
- Physical activity levels
- HRF
- Dietary intake

**+70 day assessment:**

- Immune system recovery
- QOL
- Physical activity levels
- HRF
- Dietary intake

**+180 day assessment:**

- Immune system recovery
- QOL
- Physical activity levels

**± 28 days**

**70 days**

**85 days**
